# Supplementary material for: First clinical experience with the novel cold storage SherpaPak™ system for donor heart transportation
Source: PubMed Central journal article supplement — J Thorac Dis. 2020 Dec;12(12):7227–35. doi: 10.21037/jtd-20-1827 (PMC7797872; doi:10.21037/jtd-20-1827), 2020-12
Supplement: jtd-12-12-7227-dss.pdf [file jtd-12-12-7227-dss.pdf]

## Data Sharing Statement

|                     |                                                                                                                                                    |                                                                                                                       |
|---------------------|----------------------------------------------------------------------------------------------------------------------------------------------------|-----------------------------------------------------------------------------------------------------------------------|
| <b>Article Info</b> | <a href="http://dx.doi.org/10.21037/jtd-20-1827">http://dx.doi.org/10.21037/jtd-20-1827</a> .                                                      |                                                                                                                       |
| <b>Item</b>         | <b>Question</b>                                                                                                                                    | <b>Authors' Response<br/>(place "-" if not applicable)</b>                                                            |
| 1                   | Would you like to share data collected for your study to others?                                                                                   | Yes                                                                                                                   |
| 2                   | If not, would you like to share the reason for your decision?                                                                                      | -                                                                                                                     |
| 3                   | What data in particular will be shared?                                                                                                            | Survival data, echocardiography findings 30 days after transplant and on 1 year follow up. EMB findings               |
| 4                   | Any other documents will be share? Such as study protocol, statistical analysis plan, informed consent form, clinical study report, analytic code. | Statistical analysis plan will be shared if requested. Informed consent was waived due to retrospective study design. |
| 5                   | When will data availability begin?                                                                                                                 | Publication date                                                                                                      |
| 6                   | When will data availability end?                                                                                                                   | One year within publication date.                                                                                     |
| 7                   | To whom will you share the data?                                                                                                                   | Heart surgeons who are interested in studies of organ harvesting and transportation methods.                          |
| 8                   | For what type of analysis or purpose?                                                                                                              | To compare different transportation methods.                                                                          |
| 9                   | How or where can the data/documents be obtained?                                                                                                   | Email: Radakovic_d@ukw.de                                                                                             |
| 10                  | Any other restrictions?                                                                                                                            | We may balance the potential benefits and risks for each request and then provide the data that could be shared.      |
